# Supplementary material for: Ex vivo preliminary investigation of radiographic quantitative assessment of cranial tibial displacement at varying degrees of canine stifle flexion with or without an intact cranial cruciate ligament
Source: PubMed Central journal article supplement (PMC6122192; doi:10.1186/s12917-018-1599-5), 2018-09-03
Supplement: 12917_2018_1599_MOESM1_ESM.pdf [file 12917_2018_1599_MOESM1_ESM.pdf]

**Table S1. Averaged dataset of radiographic measurements by observers.**

| Cadaver | CrCL status | Stifle angle | CrCL Length | Length of medial tibial condyle | ICD   | CrCL length normalized (tibia) | ICD normalized (tibia) |
|---------|-------------|--------------|-------------|---------------------------------|-------|--------------------------------|------------------------|
| A       | I           | 90           | 15.6        | 19.3                            | 6     | 0.808311856                    | 0.310540163            |
| A       | I           | 110          | 15.45       | 18.75                           | 4.55  | 0.824324324                    | 0.243598862            |
| A       | I           | 135          | 16.1        | 19.4                            | 4.2   | 0.829839245                    | 0.216128604            |
| A       | P           | 90           | 15.8        | 19.35                           | 6.55  | 0.816516212                    | 0.338323273            |
| A       | P           | 110          | 16.35       | 19.25                           | 5.25  | 0.849595142                    | 0.273211876            |
| A       | P           | 135          | 16.75       | 19.25                           | 4.3   | 0.870169473                    | 0.223513061            |
| A       | C           | 90           | 18.75       | 19.15                           | 9.65  | 0.979139398                    | 0.504022142            |
| A       | C           | 110          | 21.75       | 19.25                           | 10.35 | 1.129924978                    | 0.537645725            |
| A       | C           | 135          | 23.85       | 19.2                            | 11.85 | 1.242234761                    | 0.617136424            |
| B       | I           | 90           | 15.6        | 20.15                           | 4.75  | 0.774161371                    | 0.235739619            |
| B       | I           | 110          | 15.8        | 19.9                            | 4.55  | 0.794201581                    | 0.229095639            |
| B       | I           | 135          | 16.2        | 20.15                           | 3.45  | 0.804347291                    | 0.1716133              |
| B       | P           | 90           | 18.85       | 20.3                            | 8.15  | 0.929854587                    | 0.402167844            |
| B       | P           | 110          | 18.7        | 20.2                            | 7     | 0.926108374                    | 0.34686175             |
| B       | P           | 135          | 17.3        | 20.25                           | 4.6   | 0.854460323                    | 0.227308199            |
| B       | C           | 90           | 18.65       | 20.15                           | 8.2   | 0.925717945                    | 0.407110487            |
| B       | C           | 110          | 22.35       | 20.45                           | 11.3  | 1.09352432                     | 0.552812186            |
| B       | C           | 135          | 20.35       | 20.2                            | 8.3   | 1.007425743                    | 0.410891089            |
| C       | I           | 90           | 16.65       | 20.05                           | 4.65  | 0.830460199                    | 0.231952736            |
| C       | I           | 110          | 16.95       | 20.15                           | 4.25  | 0.841293103                    | 0.210948276            |
| C       | I           | 135          | 18.15       | 20.15                           | 3.25  | 0.900891582                    | 0.161334417            |
| C       | P           | 90           | 17.8        | 20.1                            | 5.6   | 0.885572139                    | 0.278606965            |
| C       | P           | 110          | 17.65       | 20.25                           | 4.25  | 0.871579769                    | 0.209896113            |
| C       | P           | 135          | 17.35       | 20.15                           | 3.4   | 0.861004384                    | 0.168673957            |
| C       | C           | 90           | 23.25       | 20.2                            | 12.2  | 1.150990099                    | 0.603960396            |
| C       | C           | 110          | 22.6        | 20.2                            | 11.05 | 1.118765777                    | 0.54710438             |
| C       | C           | 135          | 23          | 20.3                            | 10.85 | 1.132983887                    | 0.534459328            |
| D       | I           | 90           | 23.1        | 24.7                            | 7.1   | 0.935287175                    | 0.287699974            |
| D       | I           | 110          | 23.65       | 24.45                           | 6.7   | 0.967485863                    | 0.274475524            |
| D       | I           | 135          | 24.1        | 24.45                           | 5.4   | 0.985697558                    | 0.221119103            |
| D       | P           | 110          | 24.75       | 24.65                           | 6.3   | 1.00410632                     | 0.255636932            |
| D       | P           | 135          | 25.5        | 24.5                            | 3.55  | 1.040816327                    | 0.144897959            |
| D       | C           | 90           | 27.85       | 24.3                            | 12.35 | 1.146015751                    | 0.508518926            |
| D       | C           | 110          | 30.2        | 24.4                            | 12.5  | 1.237675317                    | 0.512404468            |
| D       | C           | 135          | 24.65       | 24.05                           | 5.5   | 1.025190246                    | 0.230015566            |
| E       | I           | 90           | 17.85       | 23.85                           | 6.85  | 0.748523207                    | 0.287262658            |
| E       | I           | 110          | 18.15       | 23.95                           | 5.9   | 0.757836471                    | 0.246408647            |
| E       | I           | 135          | 18.8        | 23.95                           | 3.65  | 0.784998257                    | 0.152475593            |
| E       | P           | 90           | 17.95       | 24.35                           | 7.45  | 0.73718165                     | 0.306282678            |
| E       | P           | 110          | 18.35       | 24.05                           | 5.05  | 0.763010478                    | 0.209896608            |
| E       | P           | 135          | 18.55       | 24                              | 2.85  | 0.772916667                    | 0.11875                |
| E       | C           | 90           | 19.85       | 24.25                           | 9.55  | 0.818564432                    | 0.394015917            |
| E       | C           | 110          | 20.3        | 23.9                            | 7.1   | 0.8495019                      | 0.297091934            |
| E       | C           | 135          | 20.35       | 24.1                            | 6.65  | 0.844369835                    | 0.27572314             |
| F       | I           | 90           | 20.1        | 27.45                           | 7.45  | 0.732367541                    | 0.27160756             |
| F       | I           | 110          | 21.5        | 27.9                            | 6.25  | 0.771552001                    | 0.224558674            |
| F       | I           | 135          | 22.5        | 27.6                            | 4.8   | 0.815742115                    | 0.174760597            |
| F       | P           | 90           | 20.55       | 27.85                           | 7.95  | 0.738021559                    | 0.285980453            |
| F       | P           | 110          | 21.6        | 27.75                           | 7.75  | 0.778816928                    | 0.279908035            |
| F       | P           | 135          | 22.1        | 27.35                           | 6.25  | 0.808269822                    | 0.229562776            |
| F       | C           | 90           | 24.95       | 27.65                           | 12.35 | 0.902564103                    | 0.447847985            |
| F       | C           | 110          | 25.7        | 27.7                            | 11.45 | 0.92831158                     | 0.414607591            |
| F       | C           | 135          | 23.9        | 27.8                            | 8.5   | 0.860055139                    | 0.307213399            |
| G       | I           | 90           | 16.95       | 26.9                            | 7.5   | 0.630111524                    | 0.278810409            |
| G       | I           | 110          | 18.25       | 27.25                           | 6     | 0.669757326                    | 0.220197694            |
| G       | I           | 135          | 19.35       | 27.05                           | 3.8   | 0.71532732                     | 0.140440071            |
| G       | P           | 90           | 18.65       | 27.25                           | 8.35  | 0.68447491                     | 0.306502007            |
| G       | P           | 110          | 19.4        | 27.4                            | 6.95  | 0.708011988                    | 0.253619714            |
| G       | P           | 135          | 20.4        | 27.1                            | 6.75  | 0.752818935                    | 0.248638196            |
| G       | C           | 90           | 20.5        | 27.2                            | 11.15 | 0.753663152                    | 0.409610706            |
| G       | C           | 110          | 24.2        | 27.6                            | 12.65 | 0.876811594                    | 0.458333333            |
| G       | C           | 135          | 23.35       | 26.9                            | 9.8   | 0.868062465                    | 0.364524599            |
| H       | I           | 90           | 18.55       | 23.35                           | 6.65  | 0.795096419                    | 0.282286501            |
| H       | I           | 110          | 19.65       | 23.8                            | 4.65  | 0.826648274                    | 0.19422043             |
| H       | I           | 135          | 20.15       | 24.7                            | 3.15  | 0.816882563                    | 0.126180039            |
| H       | P           | 90           | 18.95       | 23.25                           | 7.65  | 0.816732809                    | 0.326960166            |
| H       | P           | 110          | 20.25       | 24.35                           | 6.1   | 0.833189655                    | 0.248935091            |
| H       | P           | 135          | 20.1        | 24.5                            | 5.9   | 0.823095823                    | 0.236691237            |
| H       | C           | 90           | 19.1        | 23.75                           | 8.8   | 0.805039434                    | 0.3665891              |
| H       | C           | 110          | 20.4        | 24.05                           | 5.35  | 0.850097081                    | 0.223380834            |
| H       | C           | 135          | 23          | 24.6                            | 8.25  | 0.935921848                    | 0.331757596            |
